# Supplementary material for: Non-canonical chemical feedback self-limits nitric oxide-cyclic GMP signaling in health and disease
Source: PubMed Central journal article supplement (PMC7305106; doi:10.1038/s41598-020-66639-w), 2020-06-19
Supplement: 41598_2020_66639_MOESM1_ESM.pdf [file 41598_2020_66639_MOESM1_ESM.pdf]

## Supplementary information

### Non-canonical chemical feedback self-limits nitric oxide-cyclic GMP signaling in health and disease

Vu Thao-Vi Dao<sup>1,2</sup>, Mahmoud H. Elbatreek<sup>1,3\*</sup>, Martin Deile<sup>4</sup>, Pavel I. Nedvetsky<sup>5</sup>, Andreas Güldner<sup>6</sup>, César Ibarra-Alvarado<sup>7</sup>, Axel Gödecke<sup>8</sup> and Harald H.H.W. Schmidt<sup>1\*</sup>

<sup>1</sup>Department of Pharmacology and Personalised Medicine, MeHNS, FHML, Maastricht University, Maastricht, The Netherlands;

<sup>2</sup>Department of Pharmacology, Johannes Gutenberg University, Mainz, Germany

<sup>3</sup>Department for Pharmacology and Toxicology, Faculty of Pharmacy, Zagazig University, Zagazig, Egypt;

<sup>4</sup>Asklepios-Klinik Radeberg, Dresden, Germany;

<sup>5</sup>Universitätsklinikum Münster, Medical Cell Biology, Münster, Germany; nedvetsk@uni-muenster.de

<sup>6</sup> Residency Anaesthesiology, Department of Anaesthesiology und Critical Care Medicine, Technische Universität, Dresden, Germany

<sup>7</sup> Facultad de Química, Universidad Autónoma de Querétaro, Mexico

<sup>8</sup> Institut für Herz- und Kreislaufphysiologie Heinrich-Heine-Universität, Düsseldorf, Germany

\*Corresponding Author: Prof Harald Schmidt, Department for Pharmacology and Personalised Medicine, MeHNS, FHML, Maastricht University, PO Box 616, 6200MD Maastricht, the Netherlands, Phone: +61-3-9905-5752; Email: [hschmidt@ppmlab.net](mailto:hschmidt@ppmlab.net) and [melbatreek@ppmlab.net](mailto:melbatreek@ppmlab.net)

Key words: endothelial cells; soluble guanylate cyclase; nitric oxide; cyclic guanosine mono phosphate; redox regulation; Bay 58-2667, apo-sGC

## SUPPLEMENTARY FIGURES

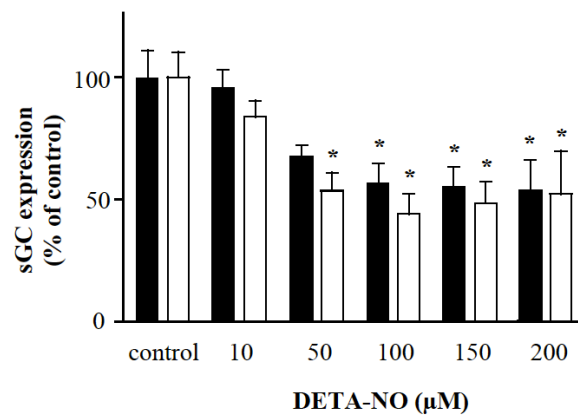

**Supplementary Fig. S1.** 100 $\mu$ M DETA-NO is the maximal concentration to downregulate sGC. Treatment of PPAECs for 72h with different concentrations of DETA-NO showed that 100 $\mu$ M is the maximal concentration to downregulate both sGC $\alpha_1$  (solid bars) and sGC $\beta_1$  (open bars) (N=6). \*P< 0.05 by one-way analysis of variance (ANOVA), data represent means  $\pm$  SEM.

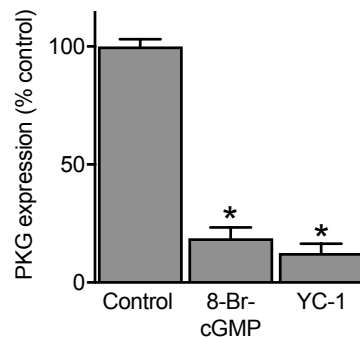

**Supplementary Fig. S2.** PPAECs display intact NO-cGMP-PKG signaling since treatment with 8-Br-cGMP (500  $\mu$ M), or YC-1 for 72hrs reduced PKG expression (N=6-9). \*P< 0.05 by one-way analysis of variance (ANOVA), data represent means  $\pm$  SEM.

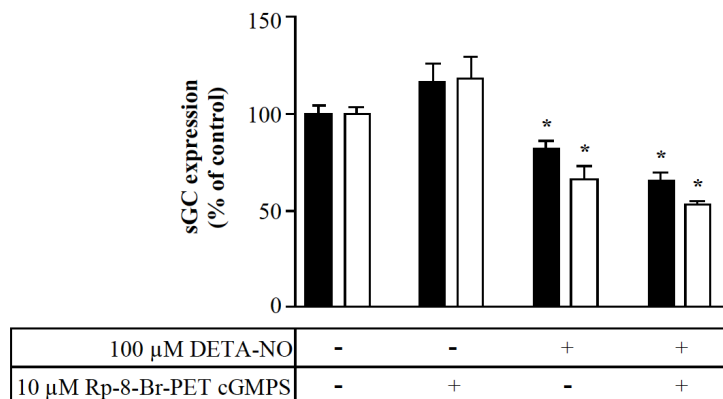

**Supplementary Fig. S3.** Inhibition of PKG does not prevent DETA-NO induced downregulation of sGC $\alpha_1$  and sGC  $\beta_1$ . Treatment of PPAECs for 72h with either 100  $\mu$ M DETA-NO, or with the PKG inhibitor Rp-8-Br-PET-cGMPS (10  $\mu$ M), or a combination thereof resulted in down regulation of sGC $\alpha_1$  (solid bars) and sGC $\beta_1$  (open bars) level that could not be reversed by Rp-8-Br-PET-cGMPS (N=6). \*P< 0.05 by one-way analysis of variance (ANOVA), data represent means  $\pm$  SEM.

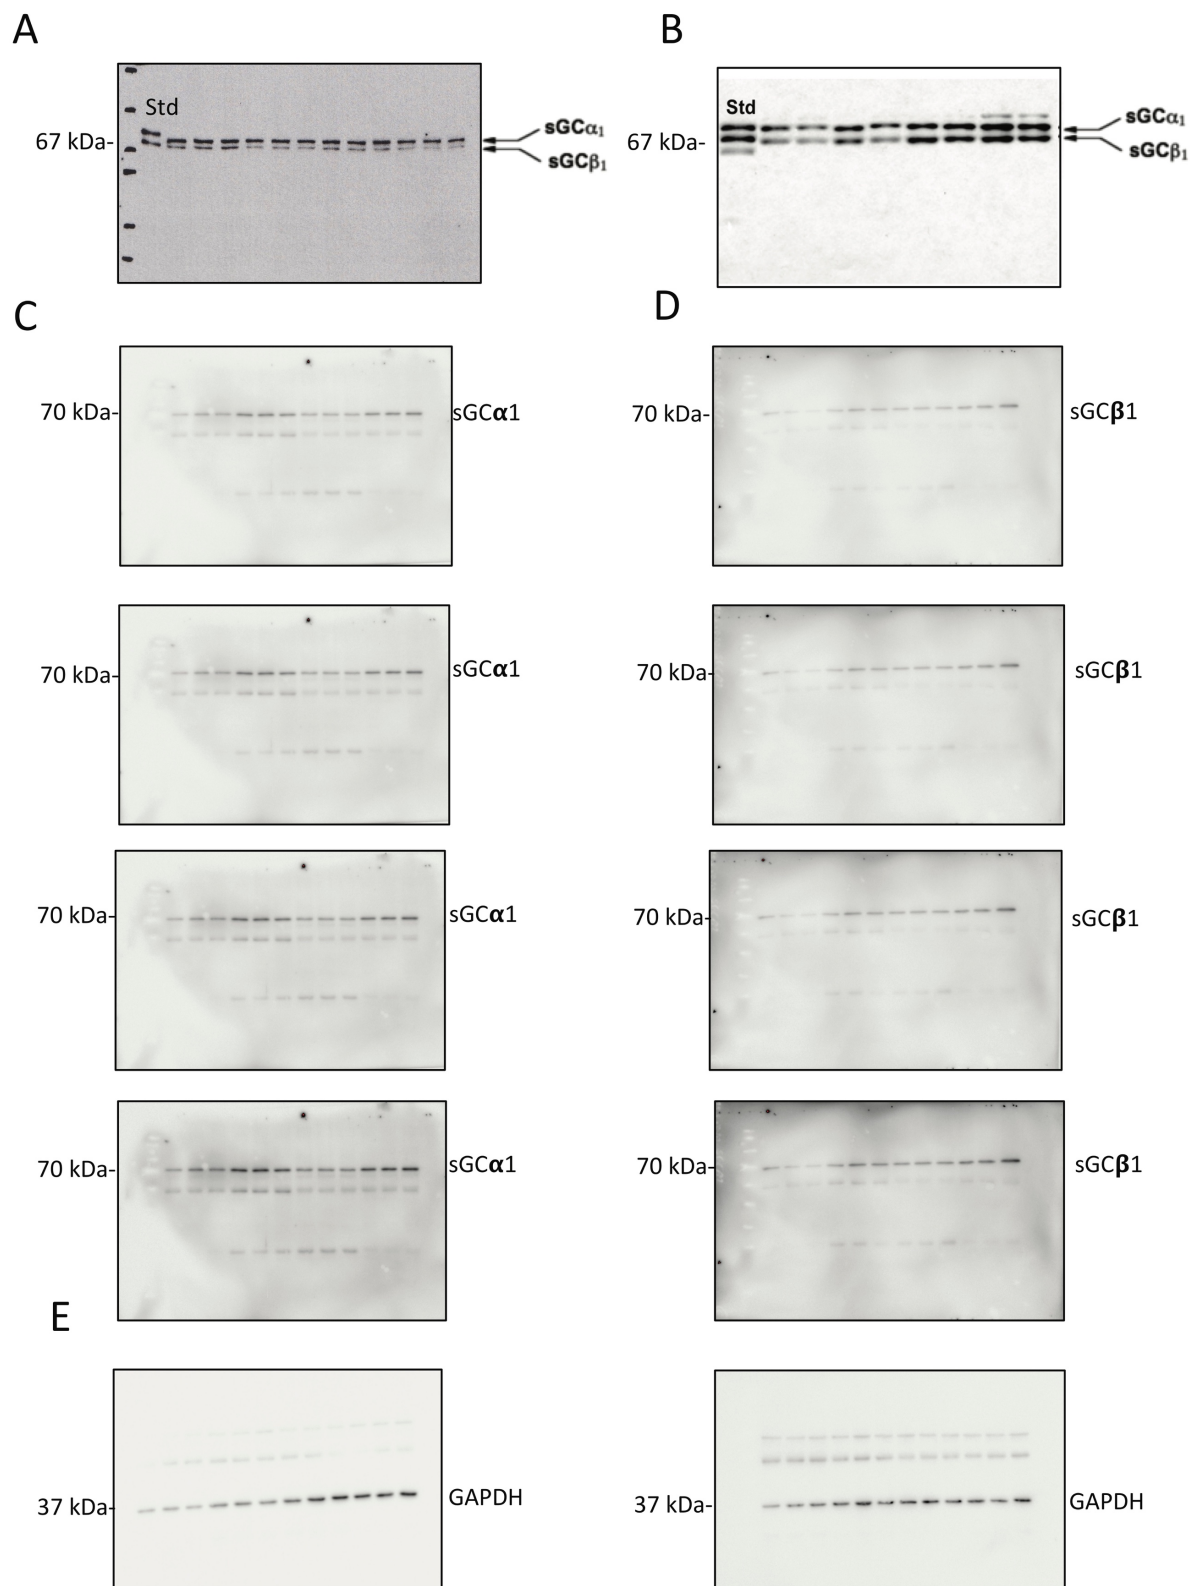

**Supplementary Fig. S4.** Representative Immune detection blots of controls, sGC $\alpha$ <sub>1</sub> and sGC $\beta$ <sub>1</sub>. A. PPAECs. B. Mouse. C-E. ARDS (Multiple exposures).
